# Supplementary material for: A network analysis of cofactor-protein interactions for analyzing associations between human nutrition and diseases
Source: PubMed Central journal article supplement (PMC4726080; doi:10.1038/srep19633), 2016-01-18

**A network analysis of cofactor-protein interactions for analyzing associations  
between human nutrition and diseases**

Marie Pier Scott-Boyer<sup>1\* +</sup>, Sébastien Lacroix<sup>1 +</sup>, Marco Scotti<sup>1,3</sup>, Melissa J. Morine<sup>1</sup>,  
Jim Kaput<sup>4</sup> and Corrado Priami<sup>1,2</sup>

<sup>1</sup> The Microsoft Research – University of Trento Centre for Computational and  
Systems

Biology (COSBI), Rovereto (TN), Italy

<sup>2</sup> Department of Mathematics, University of Trento, Italy

<sup>3</sup> GEOMAR Helmholtz Centre for Ocean Research Kiel, Kiel, Germany

<sup>4</sup> Nestlé Institute of Health Sciences, Lausanne, Switzerland

\* Corresponding author, [scottboyer@cosbi.eu](mailto:scottboyer@cosbi.eu)

+ These authors contributed equally to the work

## **Supplementary Information (SI)**

**Table S1. Cofactor-protein interactions and genetic variants in cofactor-binding sites.** List of cofactor-protein interactions from all mined databases and genetic variants in cofactor-binding sites from the Uniprot database.

**Table S2a. Gene ontology annotation results for each module detected in the cofactor-interacting proteins network.**

**Table S2b. Biological pathway enrichment results for each module detected in the cofactor-interacting proteins network.**

**Table S3. Tissue expression of cofactor-interacting proteins.**

**Table S4. Cofactor-disease interactions.** OMIM and GWAS diseases associated with genes encoding for cofactor-interacting proteins.

**Figure S1. Cofactor classification.**

**Figure S2. Overlap of cofactor-interacting proteins between the four different databases.**

**Figure S3. Per cofactor representation of the degree of connectivity of cofactors-interacting proteins.**

# Cofactors

## Inorganic

Copper (Cu)  
Iron (Fe)  
Magnesium (Mg)  
Manganese (Mn)  
Molybdenum (Mo)  
Nickel (Ni)  
Zinc (Zn)  
Cobalt (Co)  
Potassium (K)  
Calcium (Ca)  
Chloride (Cl)  
Selenium (Se)  
Phosphate

## Metal complex

Fe-S complex

## Organic

### Vitamin

Thiamine pyrophosphate [Thiamine (B1)]  
Flavin adenine mono/dinucleotide (FMN/FAD)[Riboflavin (B2)]  
NAD<sup>+</sup> and NADP<sup>+</sup> [Niacin (B3)]  
Coenzyme A/Phosphopantetheine [ B5]  
Pyridoxal phosphate [Pyridoxine (B6)]  
Biotin (B7)  
Tetrahydrofolic acid [Folic acid (B9)]  
Methylcobalamin/AdenosylCobalamine (B12)  
Ascorbic acid (C)  
Menaquinone (K)

### Transcription factor ligands

Retinol(A): RXR-RAR  
D3:VDR  
E: PXR

### Non-vitamin

In box non-vitamin box  
Biopterin  
Glutathione (GSH)  
Heme  
Heme-thiolate  
Lipoic Acid (LA)  
Molybdopterin (MPT)  
Orthoquinone  
Pyrroloquinoline quinone (PQQ)  
S-Adenosyl methionine (SAM)  
S-Adenosyl-L-homocysteine (SAH)  
Tetrahydrobiopterin (BH4)  
Topoquinone  
Ubiquinone (CoQ)

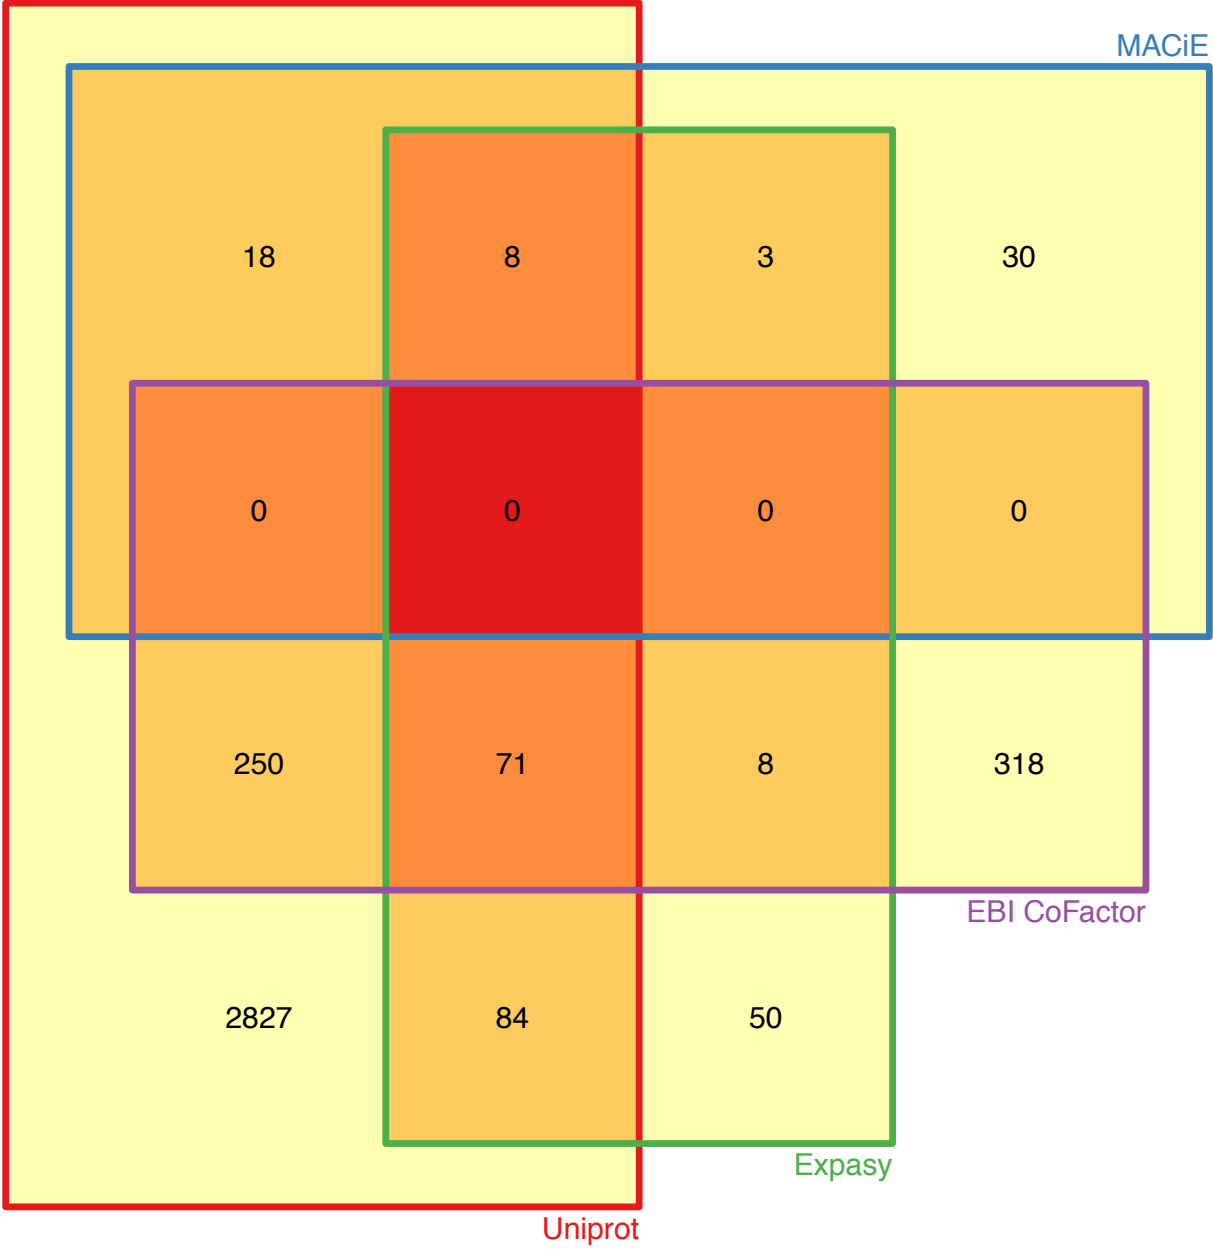

## Degree distribution of cofactors

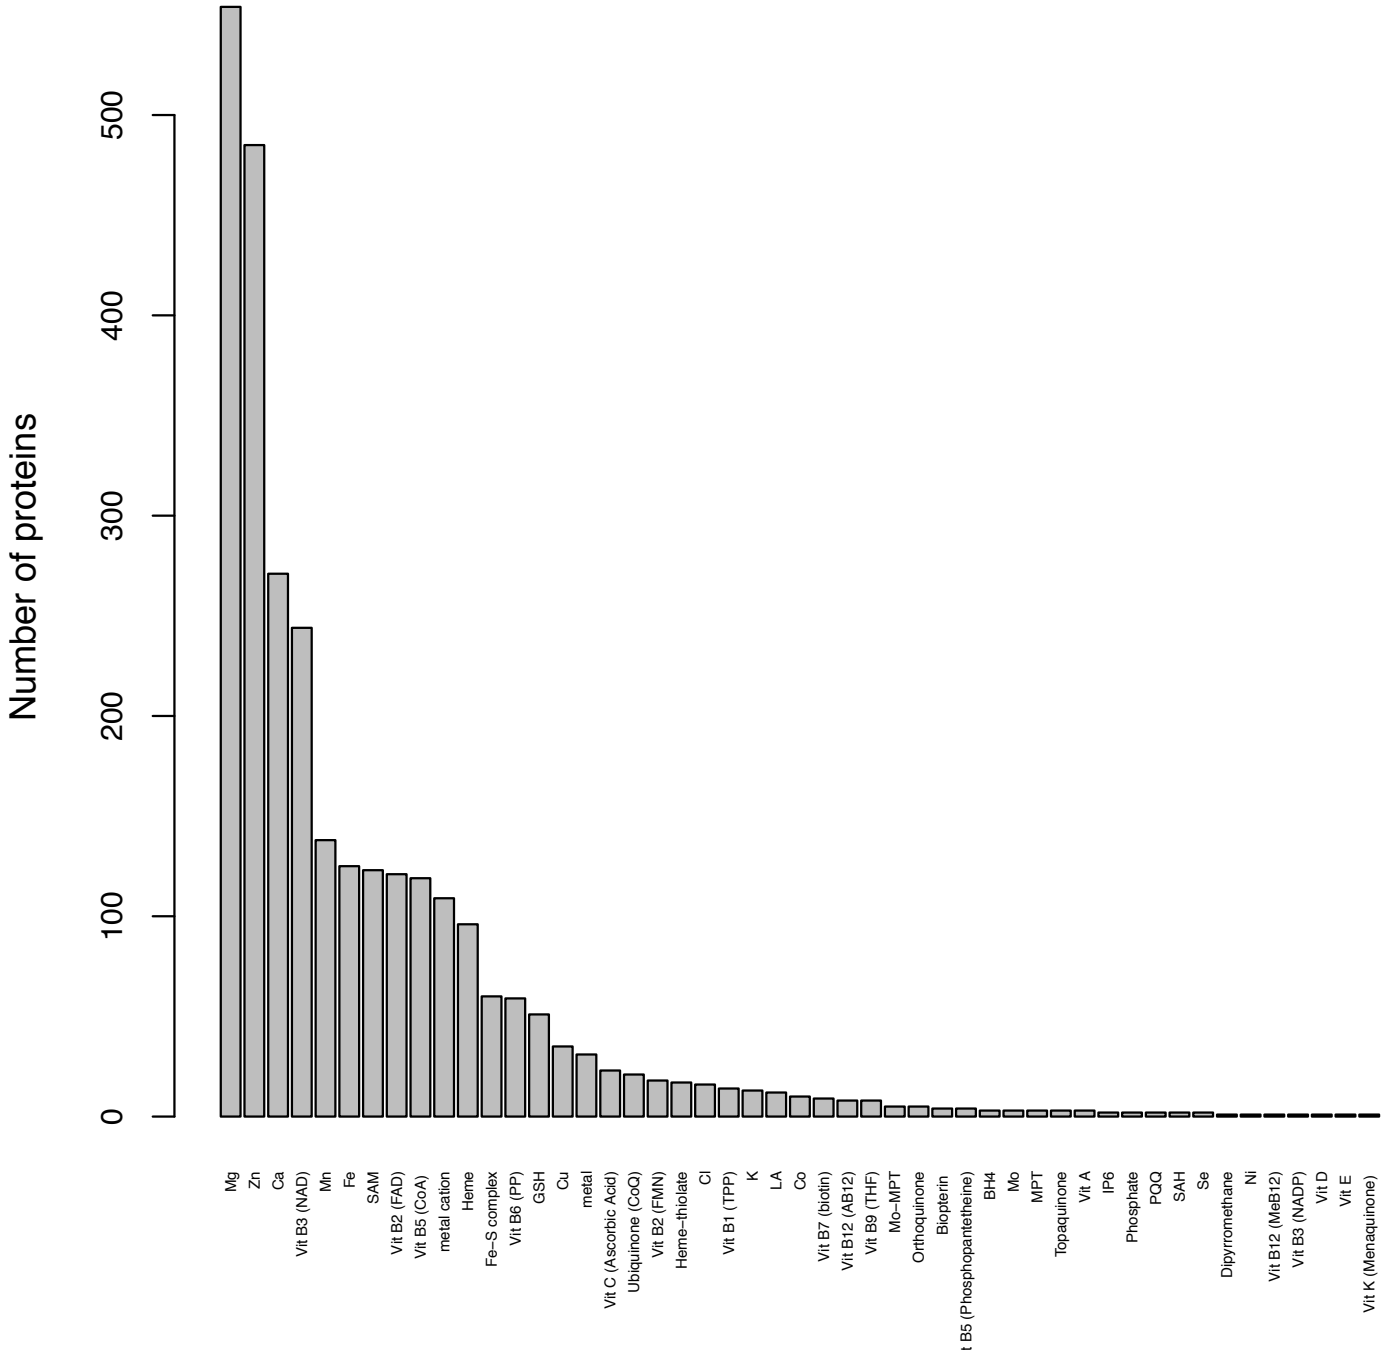

Supplement: srep19633-s1.pdf [file srep19633-s1.pdf]
